# Supplementary material for: Anticipating complex network vulnerabilities through abstraction-based analysis
Source: Springer Nature journal article supplement (doi:10.1186/2190-8532-1-9), 2012-08-22
Supplement: 13388_2011_9_MOESM4_ESM.pdf [file 13388_2011_9_MOESM4_ESM.pdf]

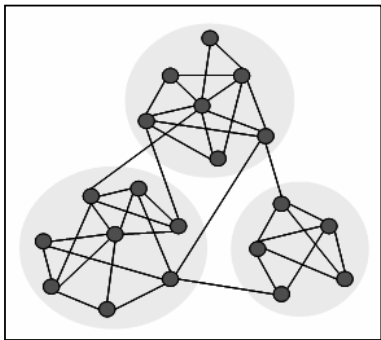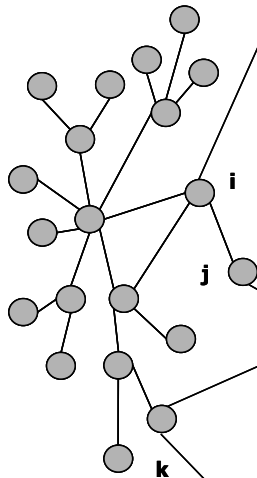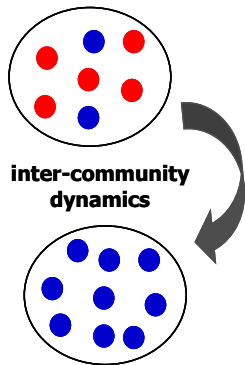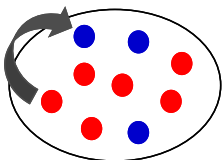

inputs

discrete system

outputs

continuous system

mode

inputs
